1 **Title: Exogenously applied ABA induced changes in physio-biochemical**  
2 **attributes in selected rice varieties under osmotic stress**

3 **Running title: Effect of ABA on rice cultivars under moisture stress**

4 **All author(s) name(s):** Goutam Kumar Dash <sup>1</sup>, Chaitanya Kumar Geda <sup>1</sup>, Soumya Kumar  
5 Sahoo<sup>1, 2</sup>, Mirza Jaynul Baig <sup>1</sup> and Padmini Swain<sup>1</sup>

6 **Corresponding Author:**

7 **Padmini Swain**

8 Crop Physiology and Biochemistry Division

9 ICAR-National Rice Research Institute, Cuttack, 753006, India

10 Tel- 91-671-2367768-83; Fax: 91-671-2367663

11 Email [pswaincrri@gmail.com](mailto:pswaincrri@gmail.com)

12 **Author affiliation:**

13 <sup>1</sup>Crop Physiology and Biochemistry Division

14 ICAR-National Rice Research Institute, Cuttack-753006, India

15

16 <sup>2</sup>Department of Plant Physiology,

17 Indira Gandhi Krishi Viswavidyalaya, Raipur

18 Chattisgarh-492012, India

19

20 **Funding:** NICRA (National Innovation on Climate Resilient Agriculture)

21 **Conflict of interest:** The authors declare that they have no conflict of interest.

22 **Ethics approval:** Not Applicable.

23 **Consent to participate:** Not Applicable

24 **Consent for publication:** Not Applicable

25 **Availability of data and material:** All the relevant data are included in the manuscript.

26 **Code availability:** Not Applicable

27 **Authors' contributions:** All the experimental analysis as well as drafting of the manuscript  
28 with statistical analysis was performed by Goutam Kumar Dash, Chaitanya Kumar Geda and  
29 Soumya Kumar Sahoo under the supervision of Dr.Padmini Swain and Dr M.J. Baig. All the  
30 authors read and approved the final manuscript.

31

32

33 **Acknowledgment:** Authors are thankful to the NICRA (National Innovation on Climate  
34 Resilient Agriculture) project for providing financial support to conduct this experiment.

35

### 36 **Abstract**

37 Drought is the most catastrophic abiotic stress that affect plant growth and  
38 development. Plant initiates alterations at physiological, biochemical and molecular levels to  
39 combat deleterious effects of drought in which abscisic acid, play a pivotal role. The present  
40 investigation was conducted to investigate how abscisic acid modulates different biochemical  
41 traits under osmotic stress. Twenty-one days old seedlings were exposed to osmotic stress,  
42 exogenously applied abscisic acid and the combination of both osmotic stress and abscisic  
43 acid to study the influence of abscisic acid on biochemical traits under moisture stress. The  
44 results reveals that abscisic acid has no influence on leaf water potential, however, it has  
45 active role in increasing osmolytes like proline.  $\Delta^1$ -pyrroline-5-carboxylate reductase and  
46 proline dehydrogenase remained unresponsiveness to ABA that indicates ABA-independent  
47 regulation of these two enzymes but the activity of  $\Delta^1$ -pyrroline-5-carboxylate synthetase and  
48 Ornithine- $\delta$ -aminotransferase was enhanced (3 fold) in response to abscisic acid.  
49 Antioxidative enzymes increased (catalase-2.5 fold; peroxidase- 3 fold and SOD- 6 fold) in  
50 response to abscisic acid and osmotic stress, gave an insight of the regulation of these traits  
51 under the influence of abscisic acid. Aldehyde oxidase remained unresponsive to abscisic  
52 acid but showed enhanced expression when both abscisic acid and osmotic stress was applied  
53 suggest its ABA-independent regulation. The information provided here has significance in  
54 understanding the regulation of different catabolite that play important role in drought  
55 tolerance and can be implemented for the development of drought-tolerant varieties.

56 **Keywords:** ABA, aldehyde oxidase, biochemical traits, Osmotic stress, P5CS and P5CR.

### 57 **Abbreviations:**

58 P5CS-  $\Delta^1$ -pyrroline-5-carboxylate synthase; P5CR-  $\Delta^1$ -pyrroline-5-carboxylate reductase;  
59 OAT - Ornithine- $\delta$ -aminotransferase; PDH- proline dehydrogenase; M- Mannitol; ABA-  
60 Abscisic acid; LWP- Leaf water potential; AO- Aldehyde oxidase; MTT- 3[4,5-  
61 dimethylthiazol-2-yl]-2,5-diphenyltetrazolium-bromide; GSH- reduced glutathione; DTT-  
62 dithiothreitol; PAGE- polyacrylamide gel electrophoresis

63

## 64 ***Introduction***

65 Drought is the most significant environmental stress in agriculture that affect plant  
66 growth and productivity (Xoconostle-Cazares et al. 2010). It impairs physiological and  
67 biochemical processes and causes severe damage to the plant. To nullify the effect of  
68 drought, plants develop certain morphological (Farooq et al. 2010; Dash et al. 2017),  
69 physiological (Sibounheuang et al. 2006), biochemical and molecular mechanisms by altering  
70 its cellular metabolism and defense mechanism that includes closing of stomata to reduce  
71 water loss, accumulation of osmo-regulators to retain water inside the cell and production of  
72 reactive oxygen species (ROS) scavenging enzymes to neutralize superoxide radicals etc. The  
73 phytohormone abscisic acid plays an important role in drought tolerance mechanism which is  
74 accumulated mainly in response to drought stress. Increase in endogenous abscisic acid  
75 (ABA) level with the commencement of water stress and gradually degradation upon release  
76 of stress has been well documented (Zhang et al. 2006). ABA is thought to be an important  
77 signalling factor involved in drought tolerance. Plants having high endogenous ABA level are  
78 considered to reduce water loss through transpiration and exhibit efficient drought tolerance  
79 mechanism (Kholová et al. 2010). Evidence of growth promotion and an increase in leaf  
80 water content by foliar spraying of ABA under drought condition has been documented  
81 (Sansberro et al. 2004). ABA enhances leaf relative water content through a simultaneous  
82 increase in water uptake by aquaporins at root level and transpiration check at leaf level (Lian  
83 et al. 2006). Besides activating aquaporins, ABA increases accumulation of osmo-regulators  
84 that help in lowering water potential of the cell thus generating water potential gradient that  
85 drives uptake of water from the soil even when stomata are closed and production of anti-  
86 oxidative enzymes that protect the essential proteins and photosystems against desiccation  
87 injury (Dash and Swain 2015). Proline and soluble sugars are common osmo-regulator that  
88 are accumulated in response to drought (Jiang et al. 2012). (Savoure et al. (1997) reported an  
89 increase in P5CS gene expression under water stress in response to 50  $\mu$ M ABA but P5CR  
90 gene expression was scarcely detectable in response to ABA. Proline dehydrogenase (PDH)  
91 that is responsible for degradation of proline has been reported to decrease under water stress  
92 condition (Sharma and Verslues 2010). Proline is also synthesized in an alternate pathway  
93 using ornithine as precursors through the enzyme ornithine- $\delta$ -aminotransferases (OAT).  
94 Expression of Ornithine- $\delta$ -aminotransferase (OAT) in an ABA-dependent and ABA-  
95 independent manner has also been reported (You et al. 2012). Similarly, sugar accumulation  
96 in response to water stress contributes in maintaining osmotic adjustment. Increase in total

97 sugar and reducing sugars under water stress and in response to ABA has been observed with  
98 increased  $\alpha$ - and  $\beta$ - amylase activity (Sarfaraz-Ardakani et al. 2014). During water stress,  
99 many authors have reported increased synthesis of anti-oxidative enzymes. (Jiang and Zhang  
100 2001) reported increased generation of O<sub>2</sub> and induction of antioxidant enzyme gene  
101 expression in response to exogenously applied. But reports regarding the effect of ABA on its  
102 own biosynthesis enzymes like aldehyde oxidase (AO) is limited. In the present study,  
103 attempts are made to characterise some identified drought tolerant and susceptible genotypes  
104 on the basis of ABA modulated physiological and biochemical traits during osmotic stress.

## 105 **Materials and Methods**

106 *Plant material:* Four previously identified promising rice genotypes (*Oryza sativa* L.) (AC  
107 43037, AC 43025, AC 43012 and Lalajung) seems to be tolerant to drought stress at  
108 vegetative stage along with one tolerant (CR 143-2-2) & susceptible check (IR 64) were  
109 taken in the experimentation to further detailed study. Seeds were sterilized with 10% sodium  
110 hypochlorite solution and then germinated in petri dishes on moist filter paper. Sprouting  
111 seeds were placed in the holes of polystyrene plates supported by nylon mesh after two days  
112 of germination. The polystyrene plates were placed on the surface of plastic trays containing  
113 10 lt. of full-strength nutrient medium as described by Yoshida et al. 1976. Three sets of trays  
114 were arranged to maintain three replications (12 no. of trays) per treatment and the seedling  
115 of all varieties were placed in each tray in separate rows. Plants were allowed to grow for 21  
116 days in the nutrient solution and pH of the nutrient solution was maintained at 5.7 every day.  
117 Nutrient solution was renewed in every 5 days interval. After 21 days, the seedlings were  
118 exposed to four types of treatments for 6 days to study the effect of ABA on different  
119 biochemical traits in the presence as well as in the absence of osmotic stress. The treatments  
120 were as follows:

- 121 1) medium containing only nutrient solution i.e. control (C)
- 122 2) medium containing nutrient solution along with 2% D- mannitol (M)
- 123 3) medium containing nutrient solution along with 10  $\mu$ M ABA (ABA)
- 124 4) medium containing nutrient solution, 2% D-mannitol and 10  $\mu$ M ABA (M+ABA)

125 For each treatment, five replications were made. Osmotic potential of 2% D-mannitol was  
126 estimated to be 0.59 MPa using water potential system, WESCOR, USA. Leaf sampling was  
127 done at sixth day of treatments applied. Fully expanded second leaf was collected in a

128 polyethylene bag at the midday (1.00-2.00 pm) for estimation of physiological and  
129 biochemical traits and were stored at -80 °C.

### 130 *Determination of Leaf water potential (LWP)*

131 Leaf water potential was measured following the method of H.D. Barrs and P.E.  
132 Weatherley 1962 and Turner 1982 with the help of water potential system, Psypro, Wescor  
133 (USA).

### 134 *Estimation of Proline content*

135 Total proline content was estimated following (Bates et al. 1973). Fresh leaf sample  
136 of 0.5 g was homogenized in 10 ml of 3% aqueous sulfosalicylic acid and centrifuged at  
137 10,009 g for 10 min at 4 °C. Two millilitres of the supernatant was mixed with 2 ml of glacial  
138 acetic acid and 2 ml of acid ninhydrin (1.25 g ninhydrin in 30 ml glacial acetic acid and 20 ml  
139 6 M phosphoric acid) and kept in boiling water bath for 1 hr. The reaction was stopped by  
140 placing the tubes in an ice bath. After cooling to room temperature, 4 ml toluene was added  
141 to the reaction mixture and vortex shaken. The toluene layer was separated and the red colour  
142 intensity was measured at 520 nm.

### 143 *Enzyme assay for proline metabolism*

144 Enzyme extraction from the frozen leaf samples was carried out according to Lutts et  
145 al. 1999. One gram frozen leaf sample was homogenized in 100 mM potassium phosphate  
146 buffer containing 1 mM EDTA, 10 mM  $\beta$ -mercaptoethanol, 1% polyvinylpolypyrrolidone, 5  
147 mM MgCl<sub>2</sub> and 0.6 M KCl maintained at pH 7.4. The homogenate was centrifuged at 13,000  
148 g for 15 min at 4 °C.

149 The activity of  $\Delta^1$ -pyrroline-5-carboxylate synthase (P5CS; EC 2.7.2.11) was  
150 determined according to the method of Stines et al. (1999). Reaction was started by adding  
151 0.5 ml of enzyme extract to a mixture of 75 mM L-glutamate, 20 mM MgCl<sub>2</sub>, 100 mM Tris-  
152 HCl, 5 mM ATP and 0.4 mM NADPH. After incubation for 20 min at 37 °C, absorbance was  
153 recorded at 340 nm using UV-Visible spectrophotometer (Thermo Fisher Scientific, Finland).  
154 Enzyme activity was expressed as U mg protein<sup>-1</sup> considering 1 U is equivalent to an increase  
155 of 0.001 A<sub>340</sub> per min.

156  $\Delta^1$ -pyrroline-5-carboxylate reductase (P5CR; EC 1.5.1.2) activity was measured  
157 following the method of Madan et al. (1995). To a mixture of 0.06 mM NADH, 0.15 mM  $\Delta^1$ -  
158 pyrroline-5-carboxylic acid, 120 mM potassium phosphate buffer and 2 mM dithiothreitol,  
159 0.5 ml of enzyme extract was added and the decrease in the absorbance was recorded at 340

160 nm. P5CR activity was expressed as U mg protein<sup>-1</sup> (one unit defined as a decrease in 0.01  
161 A<sub>340</sub> per min).

162 Ornithine- $\delta$ -aminotransferase (OAT; EC 2.6.1.68) was assayed by the method of  
163 Vogel and Kopac (1960). Enzyme extract and 100 mM potassium phosphate buffer (pH 8.0)  
164 was mixed in the proportion 0.2:0.8 ml. Buffer contained 50 mM L-ornithine, 20 mM  $\alpha$ -  
165 ketoglutarate and 1 mM pyridoxal-5-phosphate. The reaction was stopped by adding 0.5 ml  
166 10% trichloro acetic acid and 0.5% O-aminobenzaldehyde in ethanol to the reaction mixture  
167 after incubation for 30 min at 37 °C. After 1 hour, the reaction mixture was centrifuged at 12  
168 0009 g for 10 min at 4 °C. Increase in absorbance was recorded at 440 nm. Enzyme activity  
169 was expressed as U mg protein<sup>-1</sup> (one unit defined as an increase in 0.01 A<sub>440</sub>).

170 For proline dehydrogenase (PDH; EC 1.5.99.8) estimation, the enzyme extract was  
171 dissolved in 0.15 M dm<sup>-3</sup> Na<sub>2</sub>CO<sub>3</sub>-HCl buffer (pH 10.3) with 13 mM dm<sup>-3</sup> L-proline and 1.5  
172 mM dm<sup>-3</sup> NAD<sup>+</sup> ((Lutts et al. 1999) and absorbance was measured at 340 nm. PDH was  
173 expressed as U mg protein<sup>-1</sup> (one unit is defined as an increase in 0.01 A<sub>340</sub> per min).

#### 174 *Anti-oxidative enzyme Assay*

175 Leaf material (1 g) was homogenized in 1.5 ml of potassium phosphate buffer (pH  
176 7.8) containing 1 mM EDTA, 1 mM ascorbate, 10% w/v sorbitol and 0.1% Triton X. The  
177 homogenate was centrifuged at 15,000g for 20 mins at 4 °C and the supernatant was used for  
178 catalase, peroxidase, and superoxide dismutase enzyme analysis. Protein concentration was  
179 detected according to the method of (Lowry et al. 1951) using the bovine serum as a standard.

180 Catalase (EC 1.11.1.6) activity was estimated by the method followed by Pereira et al.  
181 2002. To a mixture of 50 mM potassium phosphate buffer (pH 7.0) and 0.036% of H<sub>2</sub>O<sub>2</sub>, 0.1  
182 ml of enzyme extract was added and the decrease in absorbance was recorded at 240 nm and  
183 the rate of enzyme activity was expressed as U mg protein<sup>-1</sup>.

184 Peroxidase (EC 1.11.1.x) activity was estimated following the method Pütter (1974).  
185 To a mixture of 0.1 M potassium phosphate buffer (pH 7.0) and 0.018 M guaiacol, 0.1 ml of  
186 enzyme solution was added. The increase in absorbance was recorded at 436 nm and the rate  
187 of enzyme activity was expressed as U mg protein<sup>-1</sup>.

188 The activity of superoxide dismutase (SOD) (EC 1.15.1.1) was estimated by the  
189 method Giannopolitis and Ries (1977). To a mixture of 0.05 M phosphate buffer, 13 mM  
190 methionine, 75  $\mu$ M NBT and 100 nM EDTA, 0.1 ml of enzyme extract was added and placed  
191 30 cm below a light bank consisting of two 30-watt-fluorescent bulbs (reference tube must be

192 placed in the dark). The reaction was started by switching on the light and allowed to run for  
193 20 min and then terminated by switching off the light followed by covering the tubes with a  
194 black cloth. Each tube was wrapped with aluminum foil. Absorbance was read against the  
195 blank (reference tube) at 560 nm. The volume of enzyme extract producing 50% inhibition of  
196 the reaction is defined to have one unit of SOD activity.

#### 197 *Assay of Aldehyde oxidase (AO) activity*

198 Aldehyde oxidase (AO; EC 1.2.3.1)) activity was determined following the method of  
199 Zdunek and Lips (2001). Plant tissue was homogenized immediately after harvesting with  
200 acid- washed sand and ice-cold extraction medium containing 250 mM TRIS-HCl (pH 8.5), 1  
201 mM EDTA, 10 mM reduced glutathione (GSH), and 2 mM dithiothreitol (DTT). A ratio of 1  
202 g tissue to 3 ml buffer (1:3 w/v) was used to homogenize plant material and was centrifuged  
203 at 27,000g and 4 °C for 15 min. The resulting supernatant was subjected to native  
204 polyacrylamide gel electrophoresis (PAGE) with 7.5% polyacrylamide gel in a Laemmli  
205 buffer system (Laemmli 1970) in the absence of sodium dodecyl sulphate at 4 °C. Each lane  
206 in the gel was loaded with 400 µg leaf proteins. After electrophoresis, AO activity staining  
207 was developed at room temperature in a mixture containing 0.1 M TRIS-HCl, pH 7.5, 0.1  
208 mM phenazine methosulphate, 1 mM MTT (3[4,5-dimethylthiazol-2-yl]-2,5-  
209 diphenyltetrazolium-bromide) and 1 mM indole-3-aldehyde (substrate). The gel was  
210 incubated in dark overnight for the development of bands. The activity of AO was estimated  
211 based on MTT reduction, which resulted in the development of specific formazon bands  
212 which were directly proportional to enzyme activity (Rothe 1974) and quantified using the  
213 NIH Image J 1.6 computer software.

214

#### 215 **Statistical Analysis**

216 Analysis of Variance was analysed using Cropstat for windows 7.2.2007.3 (IRRI,  
217 Philippines). The least significant difference test was used to distinguish among individual  
218 mean values where applicable with a confidence level of  $p < 0.01$  and  $p < 0.001$ .

219

#### 220 **Results**

##### 221 *Effect of osmotic stress and ABA on Leaf water potential*

222 Leaf water potential substantially decreased till six days of treatment under osmotic  
223 stress and osmotic stress along with ABA ( $p < 0.05$ ) compared to control (C). Exogenous  
224 application of ABA did not affect LWP and there was no significant variation in LWP  
225 between the control plants and the plants treated with only ABA. LWP also did not seem to

226 be affected under osmotic stress by ABA treatment which was evident from the insignificant  
227 difference in LWP between M (-2.11 MPa) and M+ABA (-2.15 MPa) treatment. However, a  
228 significant difference in LWP ( $p<0.05$ ) was observed between tolerant and susceptible  
229 genotypes. Decrease in LWP in susceptible genotypes (Lalaijung and IR 64) was more than  
230 two fold to that of tolerant genotypes (AC 43025, AC 43012, AC 43037 and CR 143-2-2)  
231 both under M and M+ABA treatments (Table 1; Fig 1). LWP did not vary between M and  
232 M+ABA treatments, despite the presence of ABA in M+ABA treatment in all the susceptible  
233 genotypes.

234

### 235 *Effect of osmotic stress and ABA on proline content and proline biosynthesis enzymes*

236 Proline content increased significantly ( $p<0.05$ ) under all the three treatments (M,  
237 ABA and M+ABA) compared to control. Accumulation of proline was increased up to 22-  
238 fold and 27-fold under M and M+ABA treatment respectively after six days of treatments  
239 (Fig. 1). In ABA treatment, the accumulation of proline was only 10-fold compared to  
240 control. However, proline accumulation was more in M+ABA compared to osmotic stress  
241 (M) and ABA treatment. Significant variation was observed in proline content ( $p<0.05$ )  
242 between tolerant and susceptible genotypes. Variation in proline content in susceptible  
243 genotypes Lalaijung and IR 64 was insignificant in M and ABA treatments, however, in  
244 M+ABA treatment, Lalaijung had significantly higher proline content compared to IR 64. To  
245 elucidate the differential accumulation of proline under the three treatments, the rate of  
246 activity of enzymes involved in proline biosynthesis was studied. The activity of P5CS was  
247 20-fold more as compared to control under all the three treatments after six days of treatment.  
248 P5CS activity was significantly lower in ABA treatments of all tolerant genotypes compared  
249 to their corresponding M and M+ABA treatments. In susceptible genotypes, P5CS activity  
250 was higher than M ( $p<0.05$ ) but lower than M+ABA ( $p<0.05$ ). Amount of proline  
251 accumulated in susceptible genotypes was much lower than tolerant genotypes. (Fig. 1).

252 P5CR activity was significantly ( $p<0.05$ ) higher in M and M+ABA compared to C  
253 and ABA (7 to 9-fold increase). No significant variation in P5CR activity was observed  
254 neither between C and ABA nor M and M+ABA. However, P5CR activity in tolerant  
255 genotypes were significantly higher than in susceptible genotypes. (Table 1; Fig.1).

256 OAT activity varied significantly in all the treatments ( $p<0.05$ ). OAT activity  
257 increased about three-fold under all the three treatments compared to control after six days of  
258 treatment. OAT activity was higher in ABA compared to M but lower than M+ABA.



259 PDH decreased drastically in all the three treatments after six days of imposing  
260 treatments. M and M+ABA caused 60-78% reduction in PDH activity whereas ABA alone  
261 reduced only 20% of the enzyme activity depicted that PDH activity is less influenced by  
262 ABA. (Table 1; Fig. 1).

263

#### 264 *Effect of osmotic stress and ABA on anti-oxidative enzymes*

265 Antioxidative enzyme activity was increased under all the three treatments compared  
266 to control. On an average, catalase activity was increased more than 2.5 times under all the  
267 three treatments compared to control. A significant difference in catalase activity between  
268 tolerant and susceptible genotypes was observed (Table 1). Increase in catalase activity was  
269 approximately 60% more under osmotic stress and 16- 23% more under ABA and M+ABA  
270 in tolerant genotypes compared to susceptible ones. (Table 1; Fig. 2).

271 Similarly, peroxidase activity was increased under all the three treatments and reached  
272 up to three-fold compared to control. Tolerant genotypes showed about 2-fold increase in  
273 peroxidase activity over susceptible genotypes under M, ABA and M+ABA. (Table 2 & 4;  
274 Fig 3).

275 Superoxide dismutase activity was also increased under all the three treatments and  
276 amounting about 5-fold increase under M and M+ABA. Under ABA treatment, 4-fold  
277 increase in SOD activity was recorded after six days of treatment. It was also observed that  
278 under osmotic stress, tolerant genotypes showed 2.4-fold increase in SOD activity than  
279 susceptible genotypes whereas under ABA and M+ABA treatments, SOD activity increased  
280 about 1.2-fold in tolerant genotypes (Table 1; Fig. 2).

281

#### 282 *Effect of osmotic stress and ABA on aldehyde oxidase activity*

283 A significant increase in AO activity was observed under M and M+ABA but not  
284 under ABA treatment. Mean AO activity was increased up to 258.6% after 6 days of  
285 treatment under M whereas, under M+ABA, it was increased up to 271.3%. Under ABA  
286 treatment increase in mean AO activity was insignificant (128%) compared to M and  
287 M+ABA. It clearly indicates that AO activity is stimulated in response to osmotic stress but  
288 had no response in presence of ABA (Fig-3).

289

## 290 **Discussion**

291 Earlier studies reported the active involvement of ABA during osmotic stress. The  
292 present study represents how ABA modulates different physiological and biochemical traits  
293 during osmotic stress. In many reports, ABA is known to induce stress tolerance during  
294 osmotic stress at very low concentration through alteration at the physiological as well as at  
295 molecular level but at high concentrations, it induces oxidative stress (Kuo and Ching 2004).  
296 In our study, the decrease in LWP during osmotic stress (M) has been observed that may be  
297 due to rapid transpiration and slower water absorption through roots. The effect of ABA  
298 during stress may help in maintaining LWP through closure of stomata. No such variation in  
299 LWP was observed between M and M+ABA that clearly indicate that ABA has no influence  
300 on LWP. However, a significant difference in LWP ( $p < 0.05$ ) was observed between tolerant  
301 and susceptible genotypes. Decrease in LWP in susceptible genotypes (Lalajung and IR 64)  
302 was more than double to that of tolerant genotypes (AC 43025, AC 43012, AC 43037 and CR  
303 143-2-2) both under M and M+ABA treatments that indicates rapid transpiration in  
304 susceptible genotypes resulting in loss of turgidity and hence very low water potential  
305 compared to tolerant genotypes. Maintenance of high LWP in response to moisture stress can  
306 be the result of the accumulation of compatible solutes like proline in tolerant genotypes, that  
307 decreases the cellular osmotic potential to prevent water loss (Zhang et al. 1999). In our  
308 study, an increase in proline content was less in ABA compared to osmotic stress (M).  
309 Proline accumulation might be independent of the ABA-mediated signaling pathway.  
310 According to Zhang et al. (1999), endogenous ABA accumulation is required for proline  
311 accumulation but ABA alone is not sufficient to elicit the levels of proline accumulation  
312 observed under low water potential. The reason for this differential response might be due to  
313 the response of biosynthesis enzymes involved in proline biosynthesis towards ABA.  
314 According to Savoure et al. (1997), both the expression of P5CS and P5CR were up-regulated  
315 under osmotic stress but exogenous ABA application enhanced the expression of P5CS but  
316 not P5CR. Therefore, the glutamate might be converted to glutamate- $\gamma$ -semialdehyde (GSA)  
317 but unable to form proline due to reduced expression of enzyme P5CR. This supported our  
318 finding where a 24-fold increase in P5CS activity was observed in osmotic stress (M) and the  
319 combined effect of osmotic stress and ABA (M+ABA). Under ABA treatment, a 21-fold  
320 increase in P5CS activity was observed which was almost equal to the amount of P5CS  
321 activity produced under other two treatments (M and M+ABA). The activity of P5CR was  
322 insignificant from that of the control under the treatment of ABA. However, under osmotic  
323 stress (M) and combined effect of osmotic stress and ABA (M+ABA), P5CR activity was  
324 enhanced leading to an increase in proline content to more than 20-fold increase. The

325 alternative pathway to proline production catalyzed by OAT also enhanced both in response  
326 to osmotic stress and exogenously applied ABA. Many authors suggested that *OAT* can also  
327 produce P5C and contribute to proline accumulation (Roosens et al. 2002). Funck et al,  
328 (2008) discarded the involvement of OAT in proline accumulation and proline biosynthesis  
329 occurred predominantly via the glutamate pathway in Arabidopsis. However, the function of  
330 OAT in Arabidopsis has been questioned in part because of new information showing that it  
331 is localized in the mitochondria (Funck et al. 2008). This changing role of OAT makes it of  
332 even greater importance to determine its regulation under conditions leading to proline  
333 accumulation. Sharma and Verslues (2010) stated that exogenous ABA did not induce OAT  
334 expression which was against our findings in which 3.5-fold increase in OAT activity was  
335 observed in response to ABA. Insignificant difference in OAT activity in M, ABA and M  
336 treatments gave insights on the regulation of OAT activity by both ABA dependent and ABA  
337 independent pathways. Moreover, it can be inferred that reduced activity of P5CR might have  
338 resulted in reduced proline synthesis under ABA treatment and most of the accumulated  
339 proline might have contributed by OAT activity. The difference in proline accumulation  
340 between M and M+ABA treatment might be due to the contribution of OAT in response to  
341 ABA under M+ABA treatment. According to You et al. (2012), OAT was strongly induced  
342 by ABA in rice and both ABA-dependent and AB-independent pathway contribute to the  
343 drought-induced expression of OAT. This is in accordance with our findings. Proline  
344 dehydrogenase (PDH) is the enzyme, which is associated with the oxidation of proline to  
345 glutamate thus responsible for the reduction in proline level in cells. In our study, the activity  
346 of PDH was higher in the control condition but gradually decreased under stress. According  
347 to Shevyakova et al. (2013), ABA suppressed PDH activity when treated to the roots.  
348 Dallmier and Stewart (1992) also stated that exogenous ABA declines PDH activity, which is  
349 very small, compared to level declined in response to drought stress suggesting that ABA is  
350 not the pathway linking drought stress and PDH activity. In our experiment, no response of  
351 ABA was observed on PDH activity. However, PDH activity was declined under osmotic  
352 stress and combined effect of osmotic stress and ABA. There was much difference in PDH  
353 activity between susceptible and tolerant genotypes that might be due to lack of intracellular  
354 signal or failure in the suppression of PDH activity that contributed to low levels of proline  
355 content in susceptible genotypes.

356 The first response to osmotic stress is the production of free radicals that induce  
357 expression of many genes like anti-oxidative enzymes that helped in diluting the effect of

358 osmotic or oxidative stress. ABA biosynthesis enzymes also get activated in response to free  
359 radicals that induce H<sub>2</sub>O<sub>2</sub> production and activated anti-oxidative enzymes like catalases,  
360 peroxidases and superoxide dismutase. Interrelationship between the generation of reactive  
361 oxygen species in response to PEG-induced osmotic stress and in response to ABA with  
362 activation of anti-oxidative enzymes has been established (Jiang and Zhang 2002). This is in  
363 accordance with our finding where peroxidase, catalase and superoxide dismutase activity  
364 were enhanced by in response to M, ABA and M+ABA. Rivero et al., (2007) also reported an  
365 increase in the transcript level of SOD in transgenic lines of tobacco plants under drought.  
366 According to the findings of Rivero et al., (2007), efficient scavenging of ROS protects the  
367 photosynthetic apparatus during drought stress that leads to improved water use efficiency  
368 during and after drought stress.

369 The plant hormone abscisic acid has long been known to be involved in the response  
370 of plants to various environmental stresses, particularly drought (Zhu 2011). It mediates  
371 coordination between growth and development in response to the environment. Under non-  
372 stressful conditions, low ABA level is maintained in the plant cell which is required for  
373 normal plant growth (Finkelstein and Rock 2002). In this investigation, the effect of osmotic  
374 stress, ABA and the combined effect of osmotic stress and ABA (M+ABA) on the activity of  
375 aldehyde oxidase has been studied. The activity of AO was enhanced in response to osmotic  
376 stress and under the combined effect of osmotic stress and ABA. According to Xiong and  
377 Zhu (2003), the degradation of ABA is suppressed by osmotic stress and activated by ABA  
378 and stress relief which is in accordance with our findings. No significant change in AO  
379 activity was observed under ABA treatment. Qin and Zeevaart (2002) have demonstrated that  
380 overproduction of ABA correlated with the over-accumulation of phaseic acid which leads to  
381 the notion that ABA might restrict its own accumulation by activating its degradation even  
382 under non-stressful conditions.

### 383 **Conclusion**

384 Abscisic acid is a phytohormone that positively regulates drought tolerance at low  
385 concentration but induces senescence at high concentration. Though activation of many  
386 drought responsive enzymes is ABA-dependent, some are regulated independently of ABA.  
387 The present study revealed how ABA modulates different biochemical traits that are involved  
388 in the drought tolerance mechanism which signifies the role of ABA in drought tolerance  
389 mechanism and provided information for the development of an effective drought

390 management strategy. Though P5CS and OAT are activated through ABA, P5CR and PDH  
391 remain unresponsive which indicates proline can be synthesized independently of ABA from  
392 glutamate or can be synthesized from ornithine through an ABA-dependent pathway. Anti-  
393 oxidative enzymes produced through ABA-dependent pathway that helps in ameliorating the  
394 effects of drought stress. ABA also regulates its own endogenous level by down-regulating its  
395 own activity to maintain its optimal level inside the cell. The information provided here will  
396 be useful for carrying out an extensive analysis of the role of ABA in drought tolerance.

397 **References**

- 398 Bates LS, Waldren RP, Teare ID (1973) Rapid determination of free proline for water stress  
399 studies. *Plant Soil* 207:205–207
- 400 Dallmier KA, Stewart CR (1992) Effect of exogenous abscisic acid on proline dehydrogenase  
401 activity in maize (*Zea mays* L.). *Plant Physiol* 99:762–764. doi: 10.1104/pp.99.2.762
- 402 Dash GK, Barik M, Debata AK, et al (2017) Identification of most important rice root  
403 morphological markers in response to contrasting moisture regimes under vegetative  
404 stage drought. *Acta Physiol Plant* 39:. doi: 10.1007/s11738-016-2297-1
- 405 Dash GK, Swain P (2015) Differential response of rice genotypes to mild and severe osmotic  
406 stress during seedling stage. *Oryza* 52:307–312
- 407 Farooq M, Kobayashi N, Ito O, et al (2010) Broader leaves result in better performance of  
408 indica rice under drought stress. *J Plant Physiol* 167:1066–1075. doi:  
409 10.1016/j.jplph.2010.03.003
- 410 Finkelstein RR, Rock CD (2002) Abscisic Acid Biosynthesis and Response. *Arab B* 1:e0058.  
411 doi: 10.1199/tab.0058
- 412 Funck D, Stadelhofer B, Koch W (2008) Ornithine- $\delta$ -aminotransferase is essential for  
413 Arginine Catabolism.pdf. *BMC Plant Biol* 8:1–14
- 414 Giannopolitis CN, Ries SK (1977) Superoxide dismutases: I. Occurrence in higher plants.  
415 *Plant Physiol* 59:309–30914. doi: 10.1104/pp.59.2.309
- 416 H.D. Barrs and P.E. Weatherley (1962) A Re-Examination of the Relative Turgidity  
417 Technique for Estimating Water Deficits in Leaves. *Aust J Biol Sci* 15:413–428. doi:  
418 <https://doi.org/10.1071/BI9620413>
- 419 Jiang M, Zhang J (2001) Effect of abscisic acid on active oxygen species, antioxidative  
420 defence system and oxidative damage in leaves of maize seedlings. *Plant Cell Physiol*  
421 42:1265–1273. doi: 10.1093/pcp/pce162
- 422 Jiang M, Zhang J (2002) Water stress-induced abscisic acid accumulation triggers the  
423 increased generation of reactive oxygen species and up-regulates the activities of

- 424 antioxidant enzymes in maize leaves. *J Exp Bot* 53:2401–2410. doi: 10.1093/jxb/erf090
- 425 Jiang W, Bai J, Yang X, et al (2012) Exogenous application of abscisic acid, putrescine, or  
426 2,4-epibrassinolide at appropriate concentrations effectively alleviate damage to tomato  
427 seedlings from suboptimal temperature stress. *Horttechnology* 22:137–144
- 428 Kholová J, Hash CT, Kumar PL, et al (2010) Terminal drought-tolerant pearl millet  
429 [*Pennisetum glaucum* (L.) R. Br.] have high leaf ABA and limit transpiration at high  
430 vapour pressure deficit. *J Exp Bot* 61:1431–1440. doi: 10.1093/jxb/erq013
- 431 Kuo TH, Ching HK (2004) Hydrogen peroxide is necessary for abscisic acid-induced  
432 senescence of rice leaves. *J Plant Physiol* 161:1347–1357. doi:  
433 10.1016/j.jplph.2004.05.011
- 434 Laemmli UK (1970) Cleavage of Structural Proteins during the Assembly of the Head of  
435 Bacteriophage T4. *Nature* 227:680–685
- 436 Lian HL, Yu X, Lane D, et al (2006) Upland rice and lowland rice exhibited different PIP  
437 expression under water deficit and ABA treatment. *Cell Res* 16:651–660. doi:  
438 10.1038/sj.cr.7310068
- 439 Lowry OH, Rosebrough NJ, Farr AL, Randall RJ (1951) Protein Measurement with the Folin  
440 Phenol Reagent. *J Biol Chem* 193:265–275
- 441 Lutts S, Majerus V, Kinet J (1999) NaCl effects on proline metabolism in rice.pdf. *Physiol*  
442 *Plant* 105:450–458
- 443 Madan S, Nainawatee HS, Jain RK, Chowdhury JB (1995) Proline and proline metabolising  
444 enzymes in in-Vitro selected NaCl-Tolerant *Brassica juncea* L. Under salt stress. *Ann.*  
445 *Bot.* 76:51–57
- 446 Pereira GJG, Molina SMG, Lea PJ, Azevedo RA (2002) Activity of antioxidant enzymes in  
447 response to cadmium in *Crotalaria juncea*. *Plant Soil* 239:123–132. doi:  
448 10.3923/jbs.2009.44.50
- 449 Pütter J (1974) Peroxidases. In: *Methods of Enzymatic Analysis*
- 450 Qin X, Zeevaart JAD (2002) Overexpression of a 9-cis-Epoxycarotenoid Dioxygenase Gene

- 451 in. *J Biol Chem* 128:544–551. doi: 10.1104/pp.010663.The
- 452 Rivero RM, Kojima M, Gepstein A, et al (2007) Delayed leaf senescence induces extreme  
453 drought tolerance in a flowering plant. *Proc Natl Acad Sci U S A* 104:19631–19636.  
454 doi: 10.1073/pnas.0709453104
- 455 Roosens NH, Bitar F Al, Loenders K, et al (2002) Overexpression of ornithine- $\delta$ -  
456 aminotransferase increases proline biosynthesis and confers osmotolerance in transgenic  
457 plants. *Mol Breed* 9:73–80. doi: 10.1023/A:1026791932238
- 458 Rothe GM (1974) Aldehyde oxidase isoenzymes (E.G. 1. 2. 3. 1) in potato tubers (*Solanum*  
459 *tuberosum*). *Plant Cell Physiol* 15:493–499
- 460 Sansberro PA, Mroginski LA, Bottini R (2004) Foliar sprays with ABA promote growth of  
461 *Ilex paraguariensis* by alleviating diurnal water stress. *Plant Growth Regul* 42:105–111.  
462 doi: 10.1023/B:GROW.0000017476.12491.02
- 463 Sarfaraz-Ardakani M-R, Khavari-Nejad R-A, Moradi F, Najafi F (2014) Abscisic acid and  
464 cytokinin-induced carbohydrate and antioxidant levels regulation in drought-resistant  
465 and -susceptible wheat cultivar during grain filling under field conditions. *Int J Biosci*  
466 5:11–24. doi: 10.12692/ijb/5.8.11-24
- 467 Savoure A, Hua XJ, Bertauche N, et al (1997) Abscisic acid-independent and abscisic acid-  
468 dependent regulation of proline b.pdf. *Mol Gen Genet* 254:104–109
- 469 Sharma S, Verslues PE (2010) Mechanisms independent of abscisic acid (ABA) or proline  
470 feedback have a predominant role in transcriptional regulation of proline metabolism  
471 during low water potential and stress recovery. *Plant, Cell Environ* 33:1838–1851. doi:  
472 10.1111/j.1365-3040.2010.02188.x
- 473 Shevyakova NI, Musatenko LI, Stetsenko LA, et al (2013) Effect of ABA on the contents of  
474 proline, polyamines, and cytokinins in the common ice plants under salt stress. *Russ J*  
475 *Plant Physiol* 60:741–748. doi: 10.1134/S1021443713060125
- 476 Sibounheuang V, Basnayake J, Fukai S (2006) Genotypic consistency in the expression of  
477 leaf water potential in rice (*Oryza sativa* L.). *F Crop Res* 97:142–154. doi:  
478 10.1016/j.fcr.2005.09.006



- 479 Stines AP, Naylor DJ, Høj PB, Van Heeswijk R (1999) Proline accumulation in developing  
480 grapevine fruit occurs independently of changes in the levels of  $\delta$ 1-pyrroline-5-  
481 carboxylate synthetase mRNA or protein. *Plant Physiol* 120:923–931
- 482 Turner N (1982) The role of shoot characteristics in drought resistance of crop plants.  
483 *Drought Resist Crop with Emphas rice* 115–134
- 484 Vogel RH, Kopac MJ (1960) Some properties of ornithine  $\delta$ -transaminase from *Neurospora*.  
485 *BBA - Biochim Biophys Acta*. doi: 10.1016/0006-3002(60)90517-5
- 486 Xiong L, Zhu J-K (2003) Update on abscisic acid biosynthesis. *Plant Physiol* 133:29–36. doi:  
487 10.1104/pp.103.025395.mutant
- 488 Xoconostle-Cazares B, Ramirez-Ortega FA, Flores-Elenes L, Ruiz-Medrano R (2010)  
489 *Drought Tolerance in Crop Plants Review Molecular.Pdf*. *Am J Plant Physiol* 5:241–256
- 490 Yoshida S, Forno, Douglas A.Cock JH, Gomez K a (1976) *Laboratory Manual for*  
491 *Physiological Studies of Rice*, 3rd edn. The International Rice Research Institute, Los  
492 Banas, Philippines
- 493 You J, Hu H, Xiong L (2012) An ornithine  $\delta$ -aminotransferase gene *OsOAT* confers drought  
494 and oxidative stress tolerance in rice. *Plant Sci* 197:59–69. doi:  
495 10.1016/j.plantsci.2012.09.002
- 496 Zdunek E, Lips SH (2001) Transport and accumulation rates of abscisic acid and aldehyde  
497 oxidase activity in *Pisum sativum* L. in response to suboptimal growth conditions. *J Exp*  
498 *Bot* 52:1269–1276. doi: 10.1093/jxb/52.359.1269
- 499 Zhang J, Jia W, Yang J, Ismail AM (2006) Role of ABA in integrating plant responses to  
500 drought and salt stresses. *F Crop Res* 97:111–119. doi: 10.1016/j.fcr.2005.08.018
- 501 Zhang J, Nguyen HT, Blum A (1999) Genetic analysis of osmotic adjustment in crop plants. *J*  
502 *Exp Bot* 50:291–302. doi: 10.1093/jxb/50.332.291
- 503 Zhu J (2011) Salt and Drought Stress Signal Transduction in Plants. *Annu Rev Plant Biol*  
504 53:247–273. doi: 10.1146/annurev.arplant.53.091401.143329.Salt
- 505

506 **Fig. 1a-f** Effect of osmotic stress, ABA and combined ABA and osmotic stress on leaf water potential (LWP),  
507 proline, and proline biosynthesis enzymes (P5CS-  $\Delta^1$ -pyrroline-5-carboxylate synthase; P5CR-  $\Delta^1$ -pyrroline-5-  
508 carboxylate reductase; OAT - Ornithine- $\delta$ -aminotransferase; PDH- proline dehydrogenase) in four drought  
509 tolerant and two drought sensitive genotypes. Error bars represent SE values (n=3). Different letters indicate  
510 significant differences ( $P < 0.05$ ) among the treatments and within the genotypes. Control (C) corresponds to  
511 normal growth condition without any treatment. Osmotic stress (M) corresponds to 2% D-mannitol mediated  
512 osmotic stress; ABA corresponds to 10  $\mu$ M of ABA applied exogenously through the nutrient medium; M+ABA  
513 corresponds to 2% D-mannitol and 10  $\mu$ M ABA applied simultaneously to the nutrient medium.

514

515

516 **Fig. 2a-c** Effect of osmotic stress, ABA and combined ABA and osmotic stress on catalase (CAT), peroxidase  
517 (POX) and superoxide dismutase (SOD) in four drought tolerant and two drought sensitive genotypes. Error  
518 bars represent SE values (n=3). Different letters indicate significant differences ( $P < 0.05$ ) among the treatments  
519 and within the genotypes. Control (C) corresponds to normal growth condition without any treatment. Osmotic  
520 stress (M) corresponds to 2% D-mannitol mediated osmotic stress; ABA corresponds to 10  $\mu$ M of ABA applied  
521 exogenously through the nutrient medium; M+ABA corresponds to 2% D-mannitol and 10  $\mu$ M ABA applied  
522 simultaneously to the nutrient medium.

523

524

525 **Fig. 3** Zymograms of aldehyde oxidase (AO) activity in leaves of six rice genotypes exposed to osmotic stress,  
526 ABA and combined ABA and osmotic stress for 6 days grown in the nutrient solution. Aldehyde oxidase  
527 activity was developed using indole-3-aldehyde as substrate after native PAGE. Each lane in the gel was loaded  
528 with 400  $\mu$ g of leaf proteins. Aldehyde oxidase activity is represented as the percentage after scanning and  
529 analyzing using NIH ImageJ 1.6 software assuming activity under control as 100%. Control (C) corresponds to  
530 normal growth condition without any treatment. Osmotic stress (M) corresponds to 2% D-mannitol mediated  
531 osmotic stress; ABA corresponds to 10  $\mu$ M of ABA applied exogenously through the nutrient medium; M+ABA  
532 corresponds to 2% D-mannitol and 10  $\mu$ M ABA applied simultaneously to the nutrient medium.

533

534

535

536

537

538

539

540

541

542

543

544

545

546

547

548

549

550

551

552

553

554

555

556

557

558

559

560

561

562

563

564

565

566 Table-1 Mean of all biochemical traits of six rice genotypes measured under four treatments.

| Traits                             | Treatments | 6 DAT         | Traits                            | Treatments | 6 DAT       |
|------------------------------------|------------|---------------|-----------------------------------|------------|-------------|
| LWP (-MPa)                         | C          | -1.05 ± 0.04  | PDH (U mg protein <sup>-1</sup> ) | C          | 4.42 ± 0.15 |
|                                    | M          | -2.12 ± 0.36  |                                   | M          | 1.08 ± 0.10 |
|                                    | ABA        | -1.22 ± 0.05  |                                   | ABA        | 3.52 ± 0.11 |
|                                    | M+ABA      | -2.14 ± 0.34  |                                   | M+ABA      | 1.08 ± 0.21 |
| Proline (µM g DW <sup>-1</sup> )   | C          | 6.6 ± 0.60    | CAT (U mg protein <sup>-1</sup> ) | C          | 0.28 ± 0.01 |
|                                    | M          | 148.6 ± 30.25 |                                   | M          | 0.69 ± 0.06 |
|                                    | ABA        | 63.0 ± 7.21   |                                   | ABA        | 0.73 ± 0.03 |
|                                    | M+ABA      | 186.0 ± 19.24 |                                   | M+ABA      | 0.77 ± 0.03 |
| P5CS (U mg protein <sup>-1</sup> ) | C          | 0.05 ± 0.00   | POX (U mg protein <sup>-1</sup> ) | C          | 2.43 ± 0.11 |
|                                    | M          | 1.09 ± 0.23   |                                   | M          | 8.08 ± 0.95 |
|                                    | ABA        | 1.04 ± 0.16   |                                   | ABA        | 8.87 ± 0.97 |
|                                    | M+ABA      | 1.35 ± 0.17   |                                   | M+ABA      | 9.33 ± 1.18 |
| P5CR (U mg protein <sup>-1</sup> ) | C          | 0.03 ± 0.00   | SOD (U mg protein <sup>-1</sup> ) | C          | 0.46 ± 0.02 |
|                                    | M          | 0.27 ± 0.04   |                                   | M          | 2.53 ± 0.40 |
|                                    | ABA        | 0.04 ± 0.00   |                                   | ABA        | 2.40 ± 0.37 |
|                                    | M+ABA      | 0.27 ± 0.04   |                                   | M+ABA      | 2.77 ± 0.40 |
| OAT (U mg protein <sup>-1</sup> )  | C          | 0.31 ± 0.01   |                                   |            |             |
|                                    | M          | 1.02 ± 0.14   |                                   |            |             |
|                                    | ABA        | 1.29 ± 0.14   |                                   |            |             |
|                                    | M+ABA      | 1.58 ± 0.14   |                                   |            |             |

567 C-Medium containing only nutrient solution i.e. control; M-Medium containing nutrient solution along with 2% D- mannitol to study the effect of osmotic stress on  
 568 biochemical traits; ABA-Medium containing nutrient solution along with 60 µM ABA to study the effect of ABA on biochemical traits; M+ABA-Medium containing  
 569 nutrient solution, 2% D-mannitol and 60 µM ABA to study how ABA modulates biochemical traits under osmotic stress; P5CS- Δ1-pyrroline-5-carboxylate synthase; P5CR-  
 570 Δ1-pyrroline-5-carboxylate reductase; OAT-Ornithine-δ-aminotransferase; PDH-Proline dehydrogenase. CAT- catalase; POX- peroxidase; SOD- Superoxide dismutase.

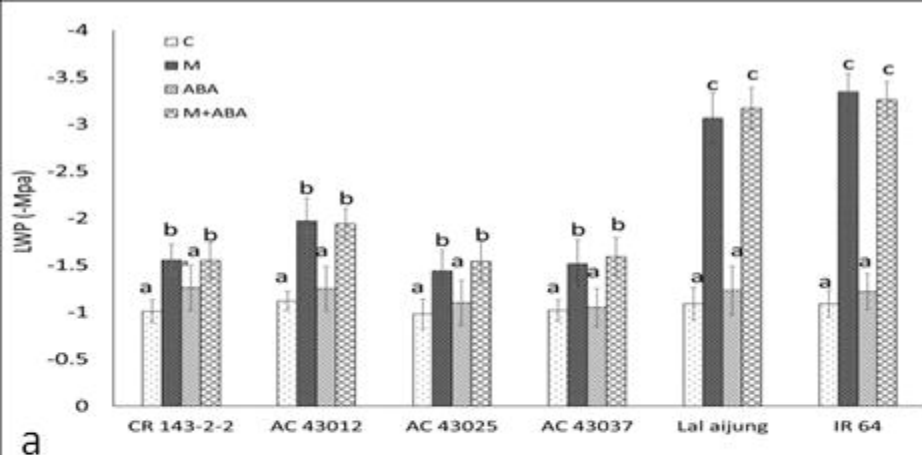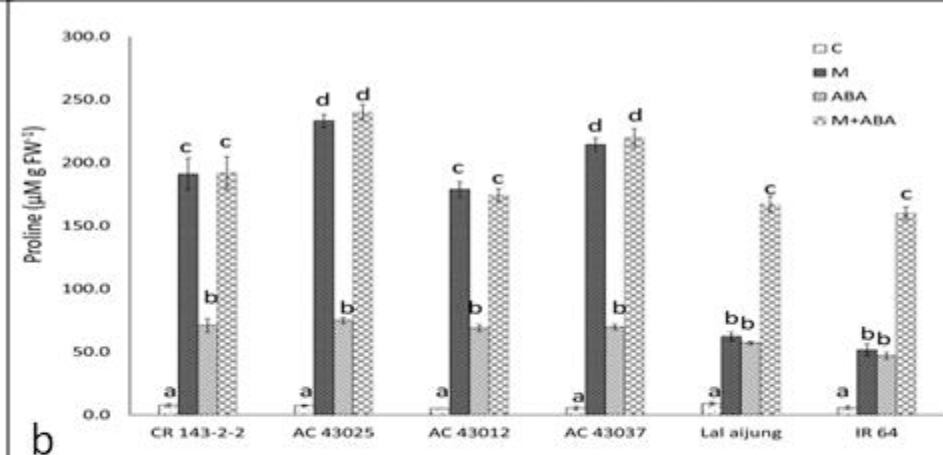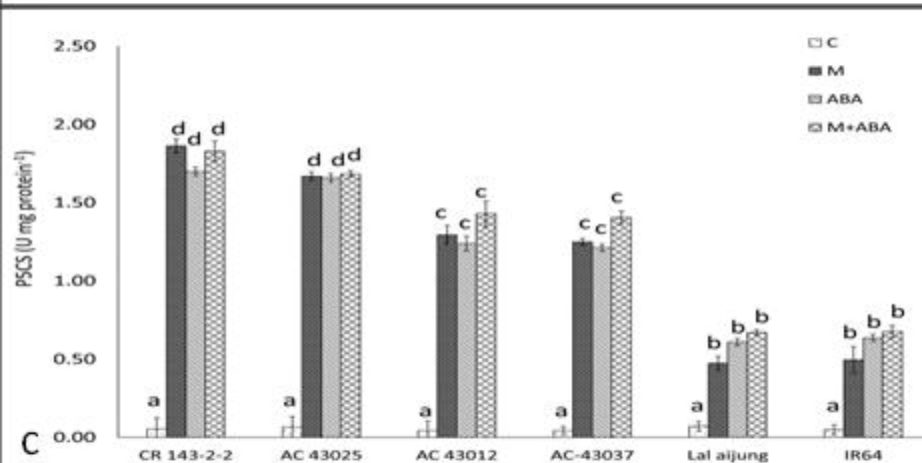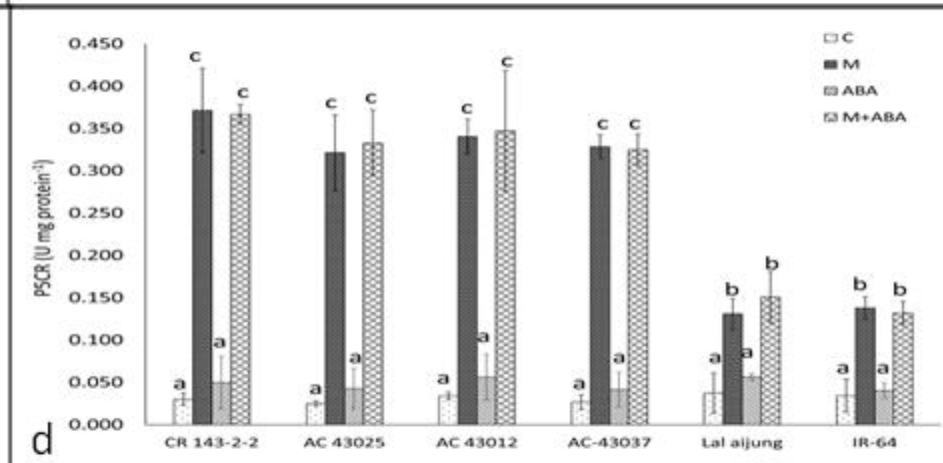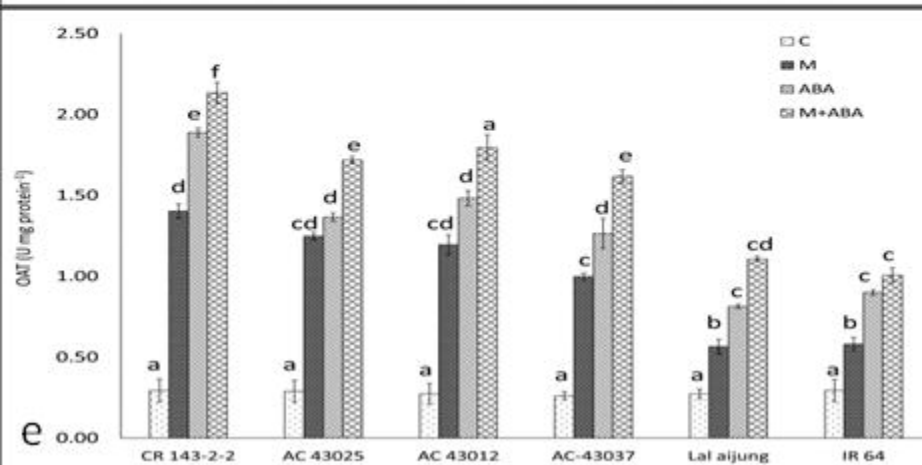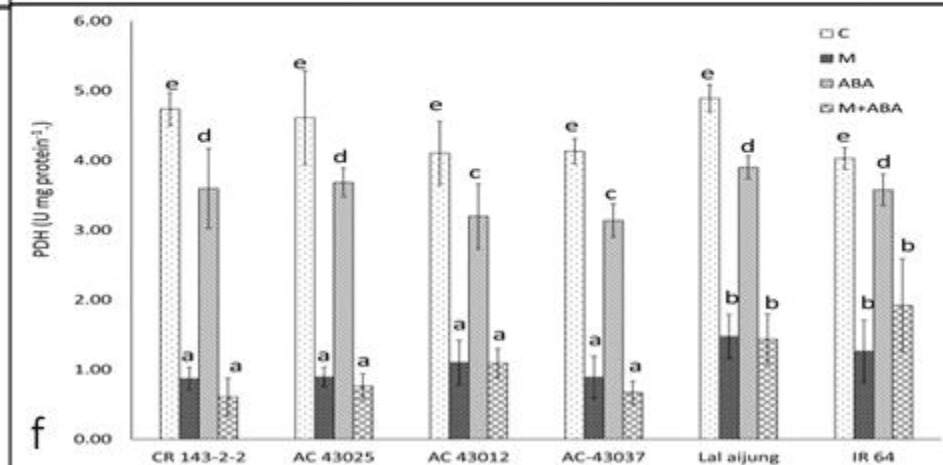

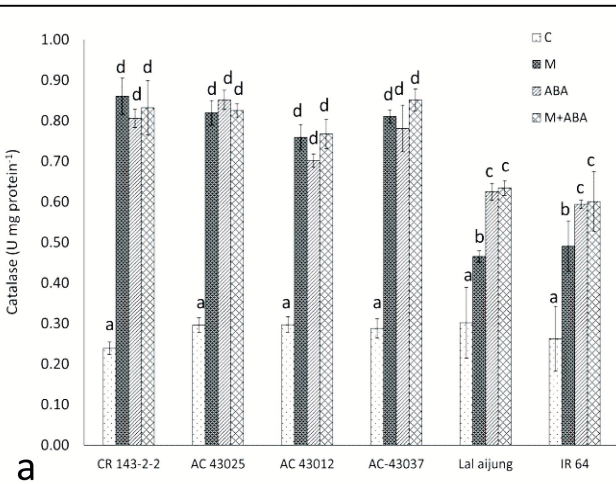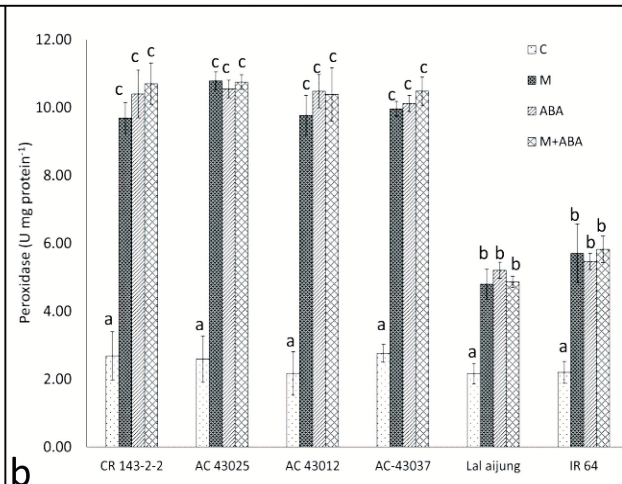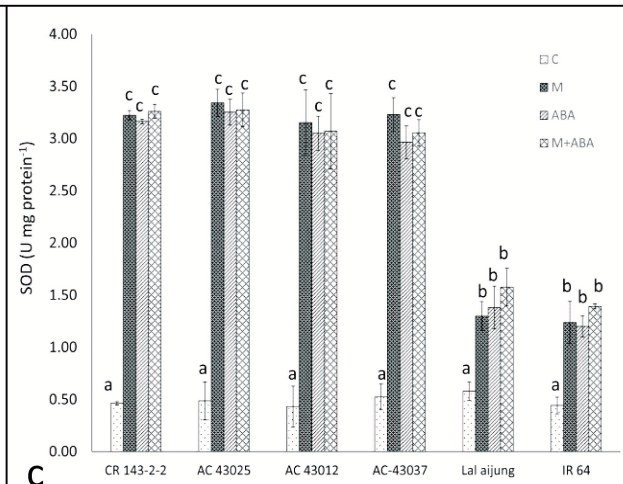

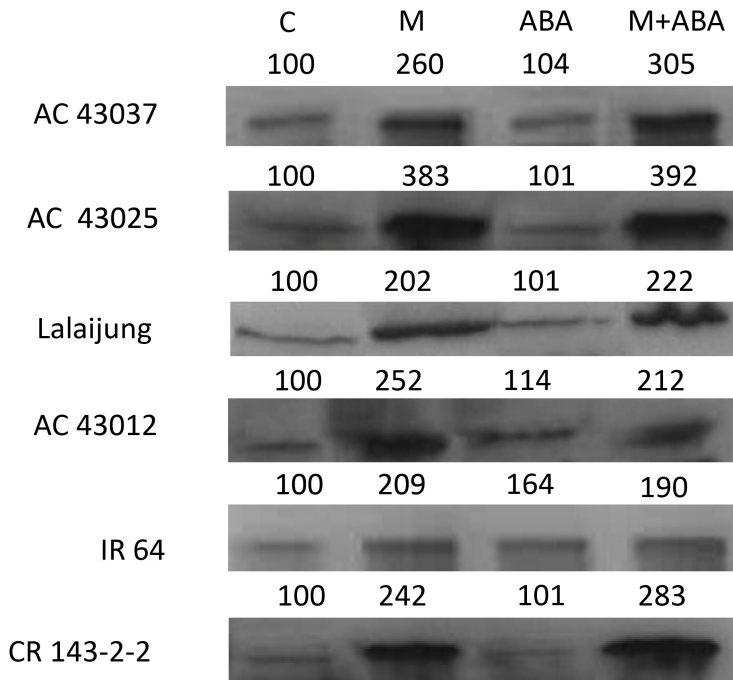

Source: http://biorxiv.org/content/10.1101/2020.05.27.116129v1.full.pdf
